# Supplementary material
Source: PubMed Central journal article supplement (PMC6361393)
Supplement: NIHMS1003198-supplement-Supporting_Information.pdf [file NIHMS1003198-supplement-Supporting_Information.pdf]

## Supporting Information

# Determining Cholesterol Binding to Membrane Proteins by Cholesterol $^{13}\text{C}$ Labeling in Yeast and Dynamic Nuclear Polarization NMR

Matthew R. Elkins <sup>1</sup>, Ivan V. Sergeyev <sup>2</sup>, and Mei Hong <sup>1\*</sup>

<sup>1</sup> Department of Chemistry, Massachusetts Institute of Technology, Cambridge, MA 02139

<sup>2</sup> Bruker Biospin, 15 Fortune Drive, Billerica, MA 01821

**Table S1.** Experimental parameters for the 2D  $^{13}\text{C}$ - $^{13}\text{C}$  correlation NMR spectra.

| Experiment                                        | 2D DQF-CC with DNP | 2D CC with DNP       | 2D CC    | INADEQUATE |
|---------------------------------------------------|--------------------|----------------------|----------|------------|
| Samples                                           | 1, 2, 3            | 1                    | 1        | 1          |
| Temperature                                       | 109 - 112 K        | 111 K                | 250 K    | 111 K      |
| MAS rate                                          | 13.33 kHz          | 13 kHz               | 12 kHz   | 13 kHz     |
| $^{13}\text{C}$ - $^{13}\text{C}$ mixing sequence | CORD               | CORD                 | CORD     | SPC5       |
| Mixing time                                       | 300, 400, 500 ms   | 30, 100, 300, 500 ms | 300 ms   | 0.6 ms     |
| $^{13}\text{C}$ carrier frequency                 | 98 ppm             | 98 ppm               | 100 ppm  | 41 ppm     |
| Number of $t_1$ points                            | 450                | 330 - 440            | 280      | 208        |
| $\omega_1/2\pi$ spectral width                    | 40 kHz             | 39 kHz               | 30.1 kHz | 62.5 kHz   |
| Maximum $t_1$ time                                | 5.0 - 6.0 ms       | 4.2 - 5.6 ms         | 4.6 ms   | 1.7 ms     |
| Number of $t_2$ points                            | 2048               | 1600                 | 1600     | 2048       |
| $\omega_2/2\pi$ spectral width                    | 62.5 kHz           | 50 kHz               | 50 kHz   | 62.5 kHz   |
| $t_2$ acquisition time                            | 16.4 ms            | 16 ms                | 16 ms    | 16.4 ms    |
| $^1\text{H}$ rf field during $t_2$                | 100 kHz            | 100 kHz              | 83.3 kHz | 100 kHz    |
| Recycle delay                                     | 2.5 - 3.0 s        | 2.5 s                | 1.5 s    | 2.5        |
| Number of scans                                   | 32 or 112          | 32                   | 320      | 64         |

Samples:

- 1 IFGA-M2T in POPC/POPG
- 2 G34, I39-labeled M2W(22-64) in POPC/POPG
- 3 G34, I39-labeled M2W(22-64) in VMS

**Table S2.** Measured M2-cholesterol cross peaks and the distance restraints input into HADDOCK.

| Atom<br>Protein        | Atom<br>CHOL | Samples | Experiments |   |   |   |   |   |   |
|------------------------|--------------|---------|-------------|---|---|---|---|---|---|
|                        |              |         | A, H        | B | C | D | E | F | G |
| I39/I42 C $\gamma$ 1   | C17          | 1       | X           | X | X | X | X |   |   |
| I35/I39 C $\gamma$ 1   | C24          | 1       | X           | X | X | X |   |   |   |
| I39/I42 C $\alpha$     | C13          | 1       | X           |   |   |   |   |   |   |
| I39/I42 C $\beta$      | C21          | 1       |             |   |   |   |   | X |   |
| I39/I42 C $\beta$      | C19          | 1       |             |   |   |   |   | X |   |
| I39/I42 C $\beta$      | C13          | 1       |             |   |   |   |   | X |   |
| I39/I42 C $\delta$     | C19          | 1       |             |   |   |   |   | X |   |
| I39/I42 C $\alpha$     | C18          | 1       |             |   |   |   |   |   | X |
| I39 C $\gamma$ 1       | C13          | 2       |             |   |   |   |   |   | X |
| I39 C $\beta$          | C15          | 2, 3    |             |   |   |   |   |   | X |
| I39 C $\beta$          | C21          | 2, 3    |             |   |   |   |   |   | X |
| I39 C $\gamma$ 2       | C17          | 3       |             |   |   |   |   |   | X |
| F47 C $\delta\epsilon$ | C9           | 1       |             |   | X | X |   |   |   |
| F47 C $\delta\epsilon$ | C3           | 1       |             | X |   |   |   |   |   |

## Experiments:

- A 30 ms 2D CC spectra at 111 K
- B 100 ms 2D CC spectra at 111 K
- C 300 ms 2D CC spectra at 111 K
- D 500 ms 2D CC spectra at 111 K
- E 300 ms & 500 ms 2D DQF-CC spectra at 111 K
- F 400 ms 2D DQF-CC spectra at 111 K
- G 300 ms 2D CC spectra at 250 K
- H 0.6 ms dipolar INADEQUATE spectrum at 111 K

## Samples:

- 1 IFGA-M2T in POPC/POPG
- 2 G34, I39-labeled M2W(22-61) in POPC/POPG
- 3 G34, I39-labeled M2W(22-61) in VMS

**Table S3.** Distance restraints input to HADDOCK and output distances from the top docked structural model.

| Protein Atom           | CHOL Atom        | d <sub>lower</sub> (Å) | d <sub>upper</sub> (Å) | d <sub>docked</sub> (Å) |
|------------------------|------------------|------------------------|------------------------|-------------------------|
| Ambiguous restraints   |                  |                        |                        |                         |
| I39 Cγ1                | C17              | 0                      | 5                      | 5.0                     |
| I42 Cγ1                | C17              | 0                      | 5                      | 6.0                     |
| I35 Cγ1                | C24              | 0                      | 5                      | 7.4                     |
| I39 Cγ1                | C24              | 0                      | 5                      | 3.3                     |
| I39 Cα                 | C13              | 0                      | 5                      | 5.2                     |
| I42 Cα                 | C13              | 0                      | 5                      | 5.8                     |
| I39 Cβ                 | C21              | 0                      | 8                      | 5.0                     |
| I42 Cβ                 | C21              | 0                      | 8                      | 4.9                     |
| I39 Cδ                 | C19              | 0                      | 8                      | 10.6                    |
| I42 Cδ                 | C19              | 0                      | 8                      | 6.8                     |
| I39 Cα                 | C18              | 0                      | 7                      | 4.2                     |
| I42 Cα                 | C18              | 0                      | 7                      | 4.6                     |
| I39 Cβ                 | C13              | 0                      | 8                      | 5.3                     |
| I42 Cβ                 | C13              | 0                      | 8                      | 4.7                     |
| Unambiguous restraints |                  |                        |                        |                         |
| I39 Cγ1                | C13              | 0                      | 8                      | 5.9                     |
| I39 Cβ                 | C15              | 0                      | 8                      | 5.2                     |
| I39 Cβ                 | C21              | 0                      | 8                      | 5.0                     |
| I39 Cγ2                | C17              | 0                      | 8                      | 3.7                     |
| I35 Cα                 | C25 <sup>†</sup> | 8.2                    | 9.2                    | 8.0                     |
| L36 Cα                 | C25 <sup>†</sup> | 6.6                    | 7.6                    | 7.7                     |
| I39 Cα                 | C25 <sup>†</sup> | 6.6                    | 7.6                    | 6.5                     |
| L40 Cα                 | C25 <sup>†</sup> | 8.7                    | 9.7                    | 10.0                    |
| I39 Cγ2                | C26 <sup>†</sup> | 0                      | 8                      | 6.7                     |
| I39 Cα                 | C26 <sup>†</sup> | 0                      | 8                      | 7.2                     |
| I39 Cα                 | C27 <sup>†</sup> | 0                      | 8                      | 7.6                     |
| F47 Cγ, δ, ε           | C3               | 0                      | 7                      | 4.4*                    |
| F47 Cγ, δ, ε           | C9               | 0                      | 8                      | 6.3*                    |

\* Distances measured from F47 Cγ

† Restraints from <sup>13</sup>C-<sup>19</sup>F or <sup>13</sup>C-<sup>13</sup>C experiments reported previously<sup>1</sup>

**Table S4.** Relative vector orientation restraints input into HADDOCK and the output angles from the docked structural model. Angle restraints are based on simulations of experimental  $^2\text{H}$  NMR spectra reported previously.<sup>1</sup>

| Vectors                              | Atoms                                                                  | Input Angle | Output Angle |
|--------------------------------------|------------------------------------------------------------------------|-------------|--------------|
| Bilayer normal<br>Cholesterol Z axis | I35 <sub>D</sub> C $\alpha$ - W41 <sub>D</sub> C $\alpha$<br>C13 - C3  | $11 \pm 5$  | $20^\circ$   |
| Bilayer normal<br>Cholesterol X axis | I35 <sub>D</sub> C $\alpha$ - W41 <sub>D</sub> C $\alpha$<br>C10 - C19 | $79 \pm 15$ | $77^\circ$   |

**Table S5.** HADDOCK parameters and orientation angles from the top 10 HADDOCK structures as determined by agreement with cholesterol  $\beta$  and  $\gamma$  angles obtained from  $^2\text{H}$  NMR spectra.<sup>1</sup> The HADDOCK score is reported in arbitrary units.

| HADDOCK score | HADDOCK rank | PRODIGY score (kcal/mol) | PRODIGY rank | $\beta$ | $\gamma$ | RSS ( $\beta, \gamma$ ) (degrees) <sup>2</sup> | RSS Rank |
|---------------|--------------|--------------------------|--------------|---------|----------|------------------------------------------------|----------|
| -14.18        | 2            | -7.43                    | 67           | 20.1°   | 16.0°    | 125                                            | 1        |
| -12.64        | 6            | -6.88                    | 179          | 21.8°   | 16.9°    | 130                                            | 2        |
| 2.39          | 81           | -7.44                    | 64           | 22.8°   | 13.8°    | 131                                            | 3        |
| 8.67          | 136          | -7.38                    | 83           | 23.5°   | 8.2°     | 143                                            | 4        |
| 17.13         | 182          | -6.93                    | 169          | 23.6°   | 10.4°    | 155                                            | 5        |
| 13.97         | 167          | -7.37                    | 86           | 24.6°   | 7.2°     | 167                                            | 6        |
| 1.17          | 75           | -7.39                    | 79           | 25.0°   | 7.7°     | 191                                            | 7        |
| 4.47          | 95           | -7.39                    | 79           | 25.5°   | 7.9°     | 201                                            | 8        |
| -10.26        | 10           | -7.39                    | 79           | 25.6°   | 11.6°    | 213                                            | 9        |
| 20.14         | 194          | -7.28                    | 106          | 25.6°   | 9.3°     | 214                                            | 10       |

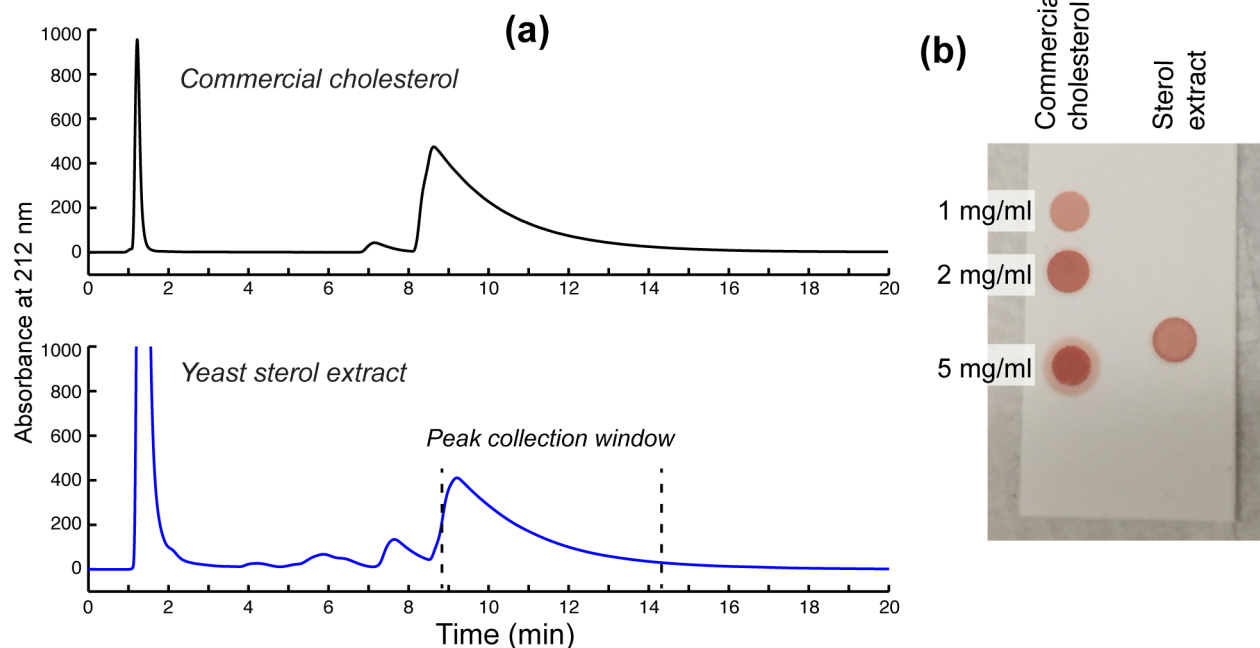

**Figure S1.** Purification and analysis of yeast-produced cholesterol. (a) HPLC traces of commercial cholesterol and the yeast sterol extract. Approximately 0.5 mg of commercial cholesterol was used at 5 mg/ml. HPLC separation used a Vydac 5  $\mu$ m, 4.6 mm x 150 mm C18 column under isocratic conditions of 30% solvent A (90% EtOH, 5% *i*-PrOH, 4.6% MeOH) and 70% solvent B (acetonitrile). (b) Spots on a TLC plate used to estimate the concentration of the yeast sterol extract. Cholesterol was spotted from an acetone solution, and the plate was developed using a ferric chloride stain (50% w/v ferric chloride, 90% v/v water, 5% v/v glacial acetic acid, 5% v/v sulfuric acid).

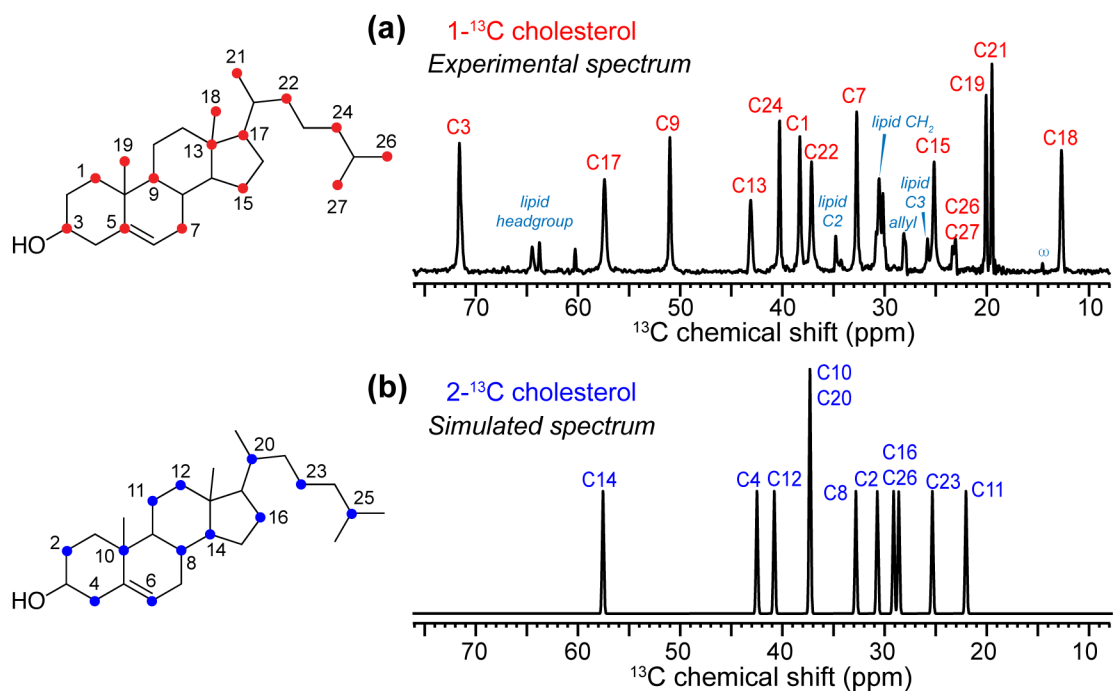

**Figure S2.** Comparison of the  $^{13}\text{C}$  chemical shifts of  $1\text{-}^{13}\text{C}$  and  $2\text{-}^{13}\text{C}$  labeled CHOL. (a) Experimental  $^{13}\text{C}$  CP spectrum of  $1\text{-}^{13}\text{C}$  CHOL in liquid-crystalline POPC/POPG bilayers, measured at 275 K. (b) Simulated spectrum of  $2\text{-}^{13}\text{C}$  CHOL, using chemical shifts from the literature<sup>2</sup> and the software NmrGlue.<sup>3</sup>

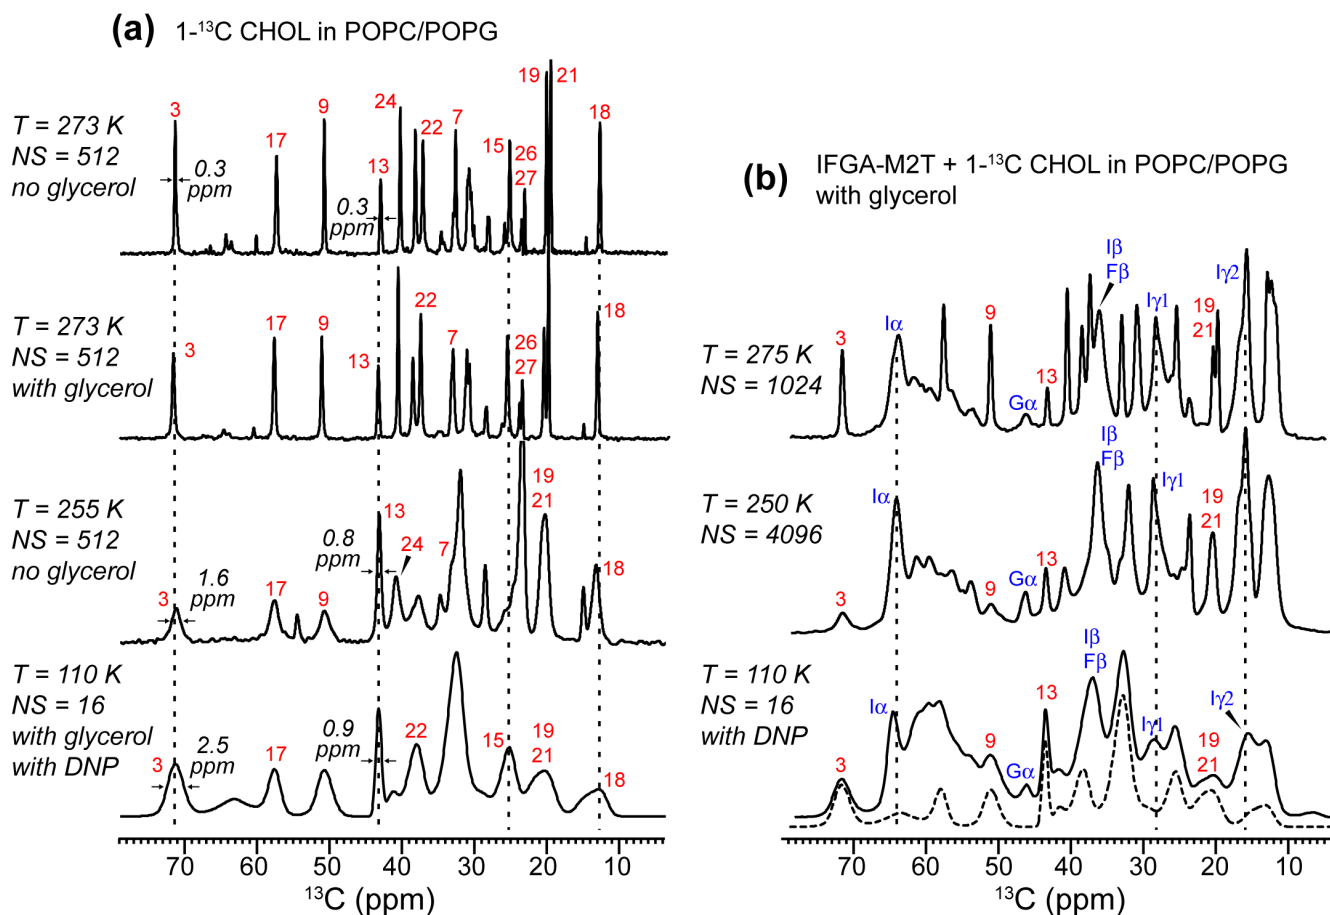

**Figure S3.** Temperature dependence of the  $^{13}\text{C}$  spectra of M2 and  $1\text{-}^{13}\text{C}$  CHOL-containing membranes. (a)  $^{13}\text{C}$  spectra of  $1\text{-}^{13}\text{C}$  CHOL in POPC/POPG bilayers as a function of temperature. At 273 K the membrane is liquid crystalline; at 255 K the membrane is in the gel phase, and at 110 K the spectrum was measured with microwave irradiation. The full widths at half-maximum show that the membrane phase transition is the main causes of the line broadening, and the degree of broadening varies for different  $^{13}\text{C}$  signals. The spectrum measured at 273 K with glycerol added shows that glycerol does not perturb the cholesterol  $^{13}\text{C}$  chemical shifts, but the spectrum shows slightly lower intensities compared to the glycerol-free sample (top) due to paramagnetic relaxation enhancement by the biradical AMUPOL in the sample.<sup>4</sup> (b)  $^{13}\text{C}$  spectra of IFGA-M2T and  $1\text{-}^{13}\text{C}$  CHOL in POPC/POPG bilayers. Dotted spectrum reproduces the CHOL-only spectrum on the left to distinguish the spectral envelopes of CHOL and M2.



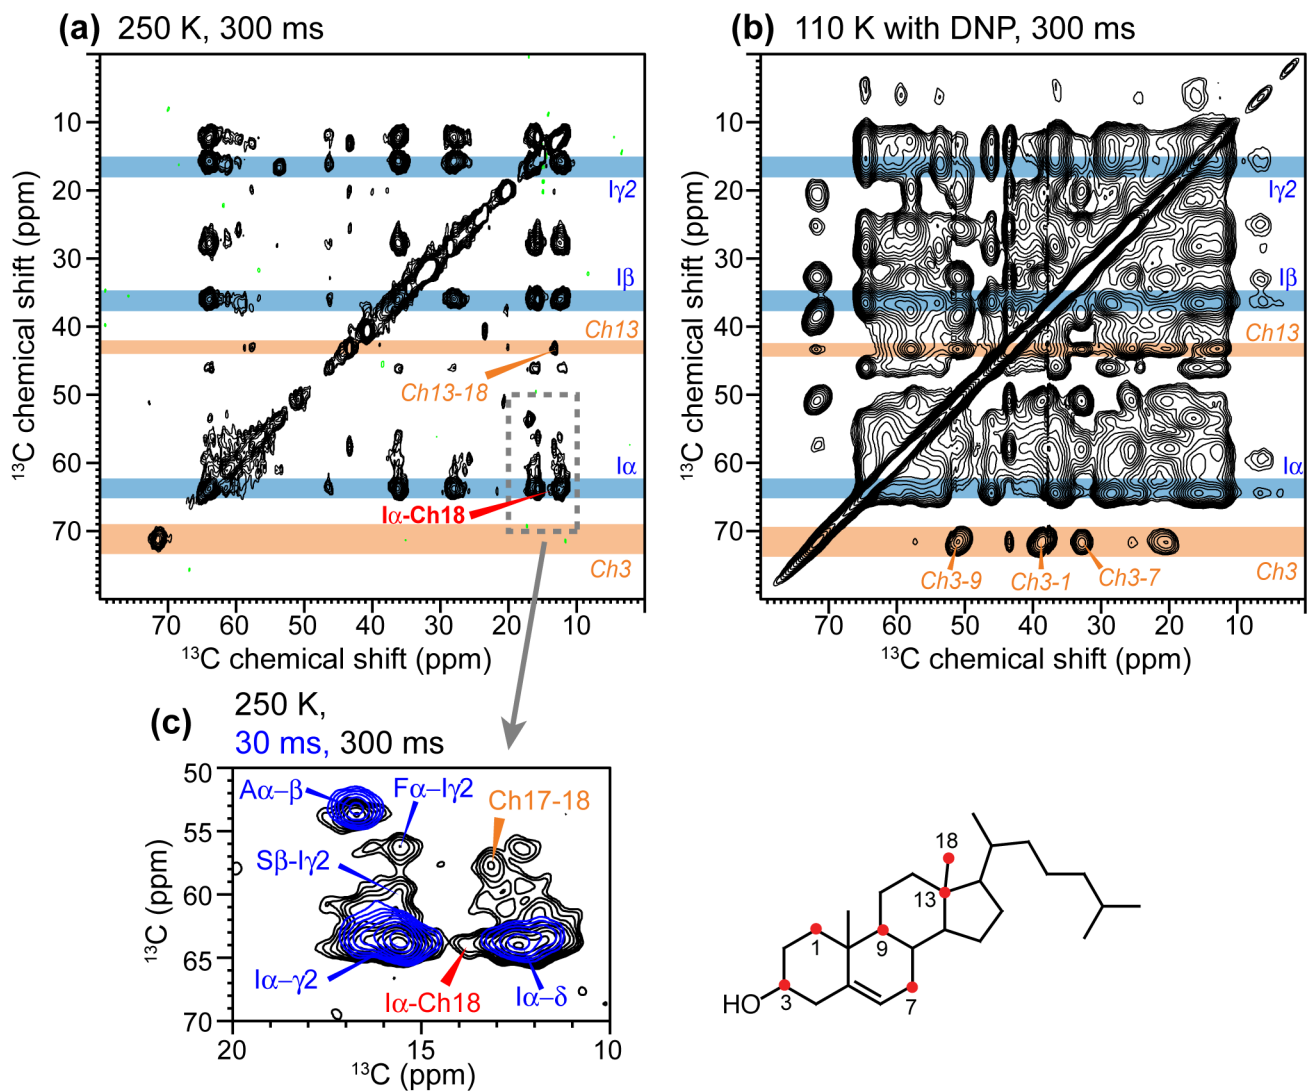

**Figure S4.** 2D  $^{13}\text{C}$ - $^{13}\text{C}$  correlation spectra of IFGA-M2T with  $1\text{-}^{13}\text{C}$  CHOL in POPC/POPG membranes. The spectra were measured with a long  $^{13}\text{C}$  spin diffusion mixing time of 300 ms. (a) 250 K spectrum measured without DNP. (b) 110 K spectrum measured with DNP. (c) An expanded view of the dashed-box region in (a) shows a cross peak between protein Ile and CHOL Ch18. This peak is absent in the 30 ms 2D spectrum (blue), indicating that it is a long-range contact. The high-temperature spectrum shows relatively narrow linewidths but few strong peaks of the protein and cholesterol due to their abundant motion in the membrane at this temperature and the general low sensitivity. The 110 K spectrum measured with DNP shows broader lines but higher sensitivity and many CHOL-CHOL and protein-CHOL cross peaks, thus allowing assignment of intermolecular contacts. Representative  $\omega_1$  cross sections for the protein (blue) and cholesterol (orange) chemical shifts are highlighted.

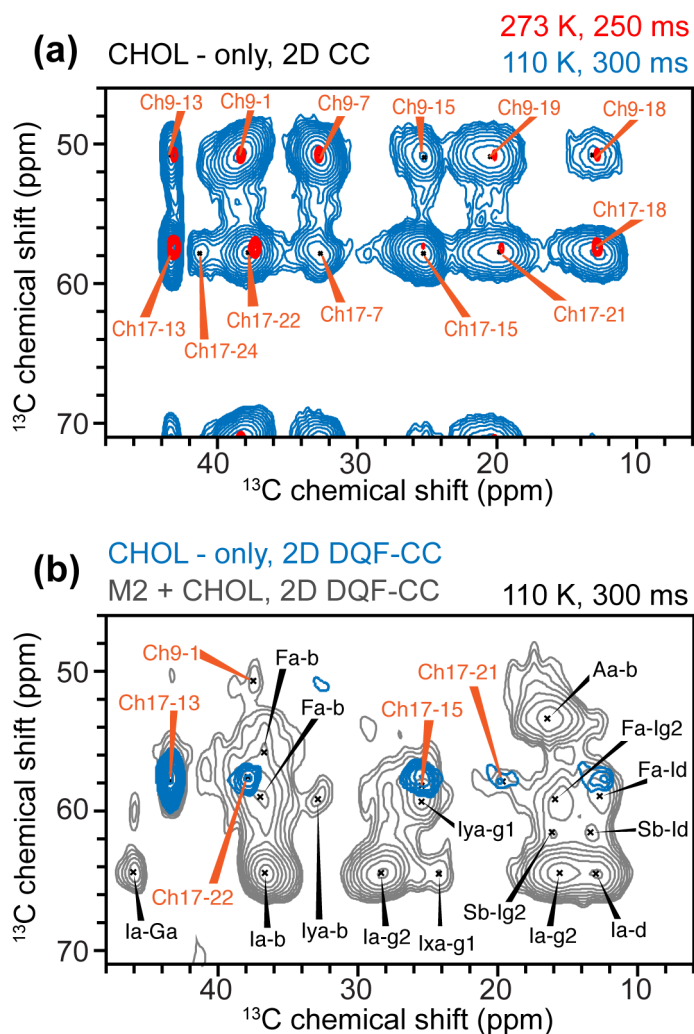

**Figure S5.** Representative 2D  $^{13}\text{C}$ - $^{12}\text{C}$  correlation spectra to illustrate resonance assignment. (a) Overlay of spectra of CHOL-containing POPC/POPG membranes measured at 273 K (red) and at 110 K with DNP (blue). No chemical shift perturbation is seen, therefore assigned CHOL  $^{13}\text{C}$  chemical shifts at high temperature can be transferred to the cryogenic-temperature spectra. (b) Overlay of DQF-CC spectra of lipid membranes with only CHOL (blue) versus with both M2 and CHOL (grey). The cholesterol  $^{13}\text{C}$  chemical shifts obtained from (a) simplify the assignment of the protein-protein cross peaks.

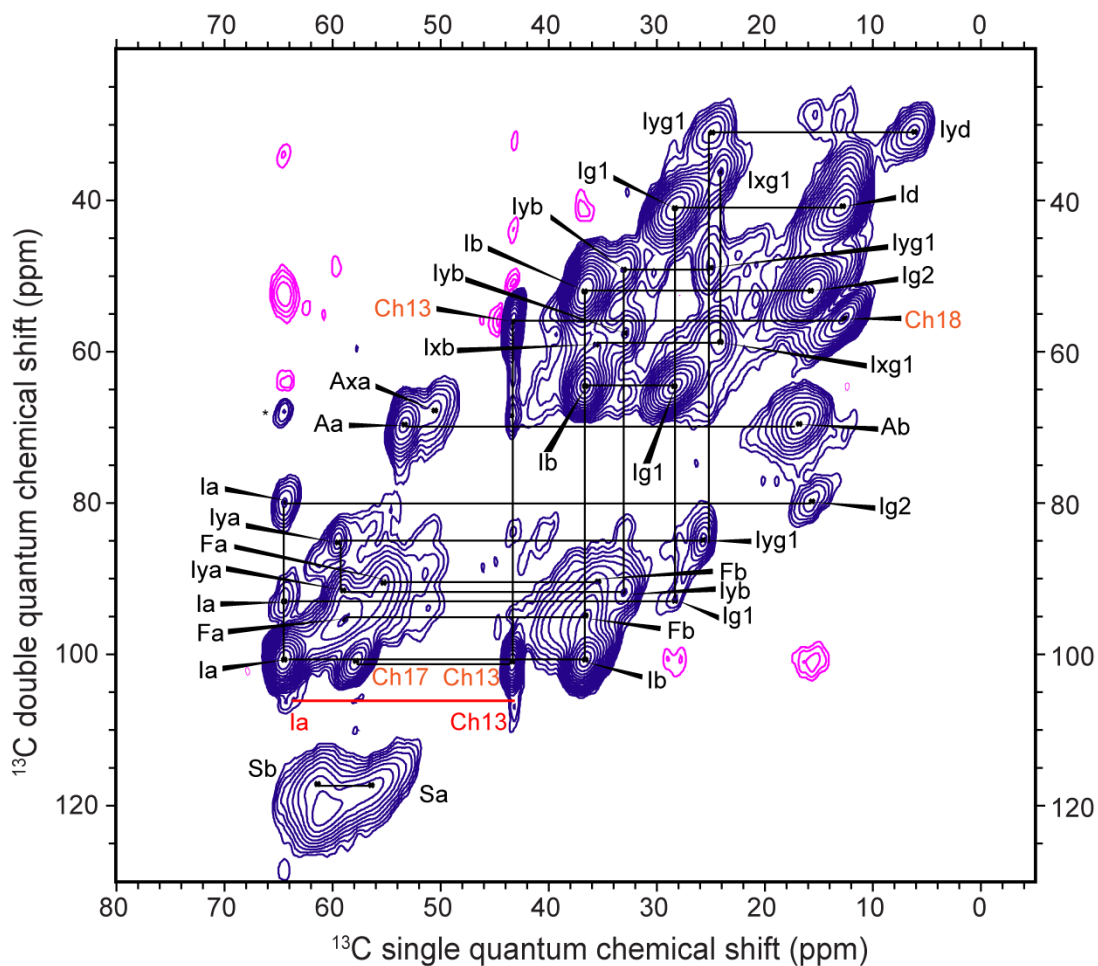

**Figure S6.** 2D dipolar INADEQUATE spectrum of IFGA-M2T with 1-<sup>13</sup>C CHOL in POPC/POPG membranes for amino-acid type assignment of the protein. The spectrum was measured under 13 kHz MAS at ~110 K with DNP. A weak Ile C $\alpha$ -Ch13 cross peak is observed. Cholesterol cross peaks are assigned in orange, protein cross peaks in black, and CHOL-M2 cross peaks in red.

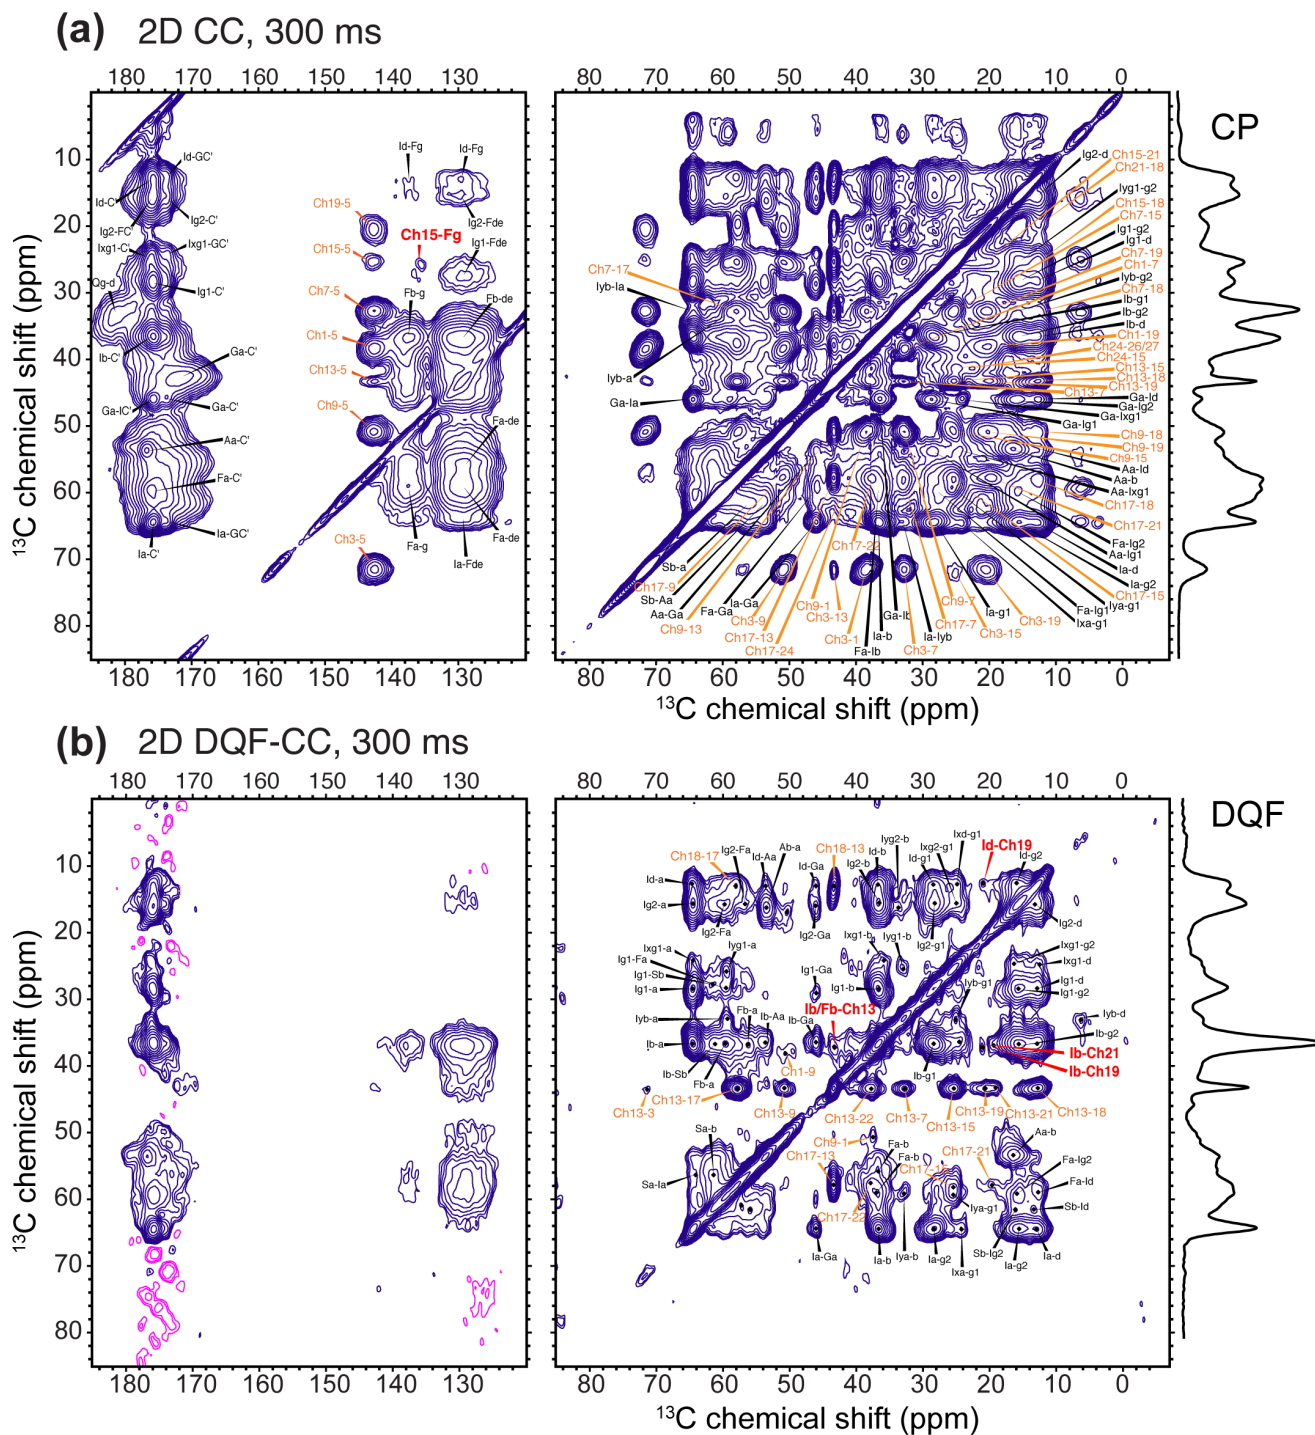

**Figure S7.** Full assignment of 300 ms 2D  $^{13}\text{C}$ - $^{13}\text{C}$  correlation spectra of IFGA-M2T and 1- $^{13}\text{C}$ -CHOL in POPC/POPG membranes, measured at 110 K with DNP sensitivity enhancement. (a) 2D CC spectrum. (b) 2D DQF-CC spectrum. Cholesterol cross peaks are assigned in orange, protein cross peaks in black, and CHOL-M2 cross peaks in red.

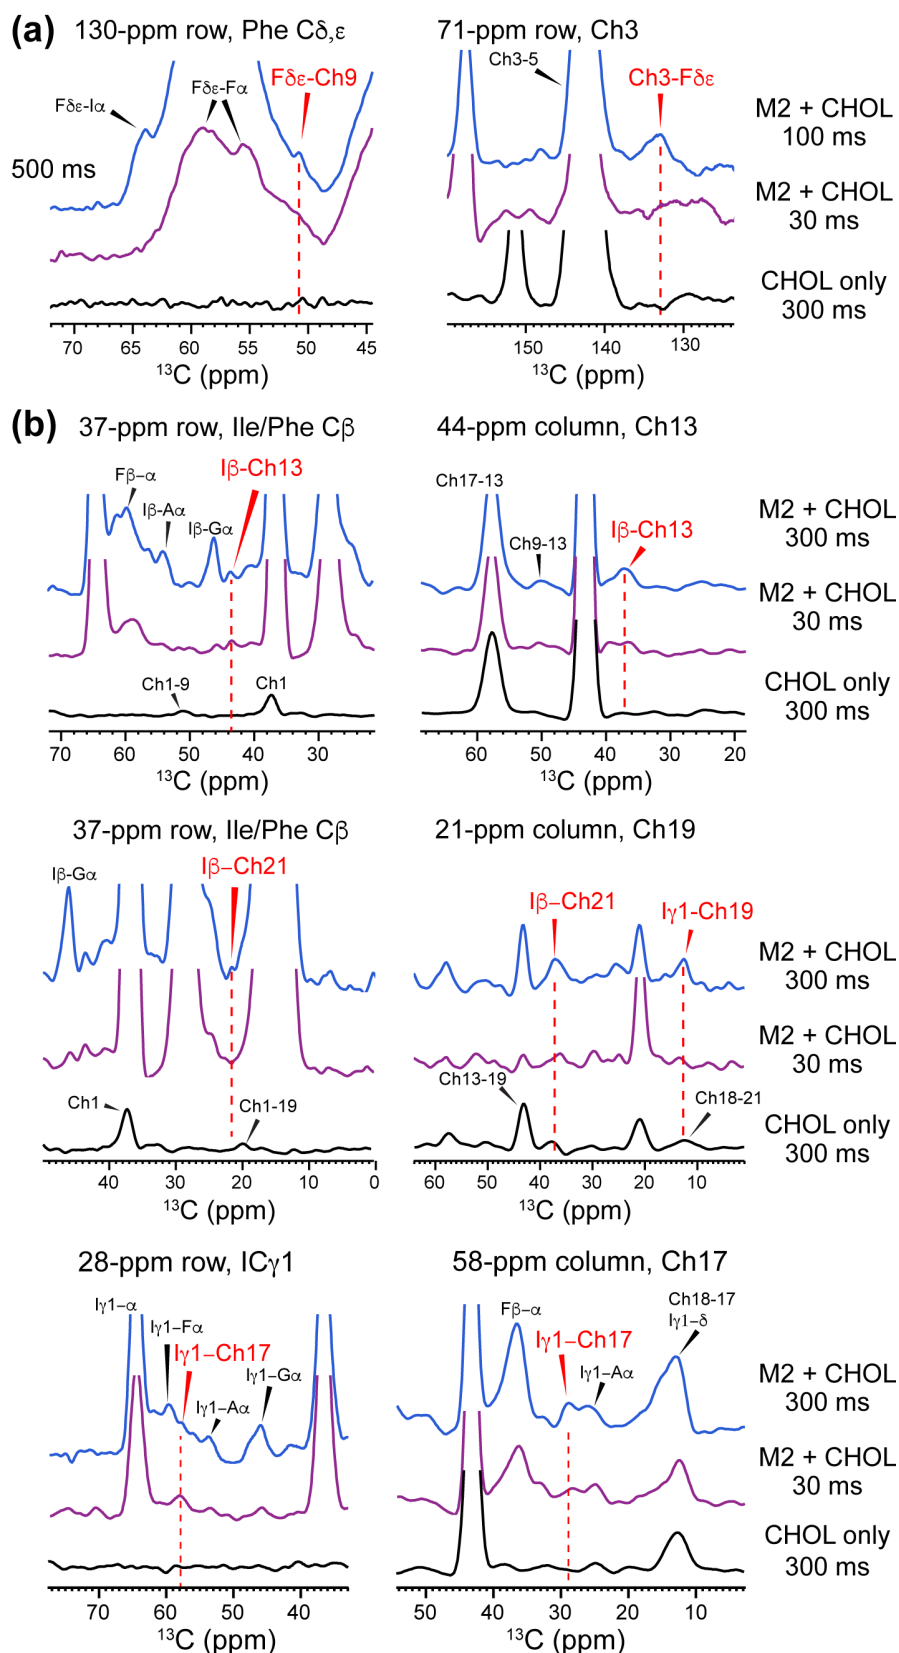

**Figure S8.** 1D  $^{13}\text{C}$  cross sections extracted from the DNP-enhanced 2D CC and DQF-CC spectra in Fig. 3. M2-containing spectra with 100-500 ms mixing are shown in blue and spectra with 30 ms mixing are shown in purple. Protein-free spectra with 300 ms mixing are shown in black.

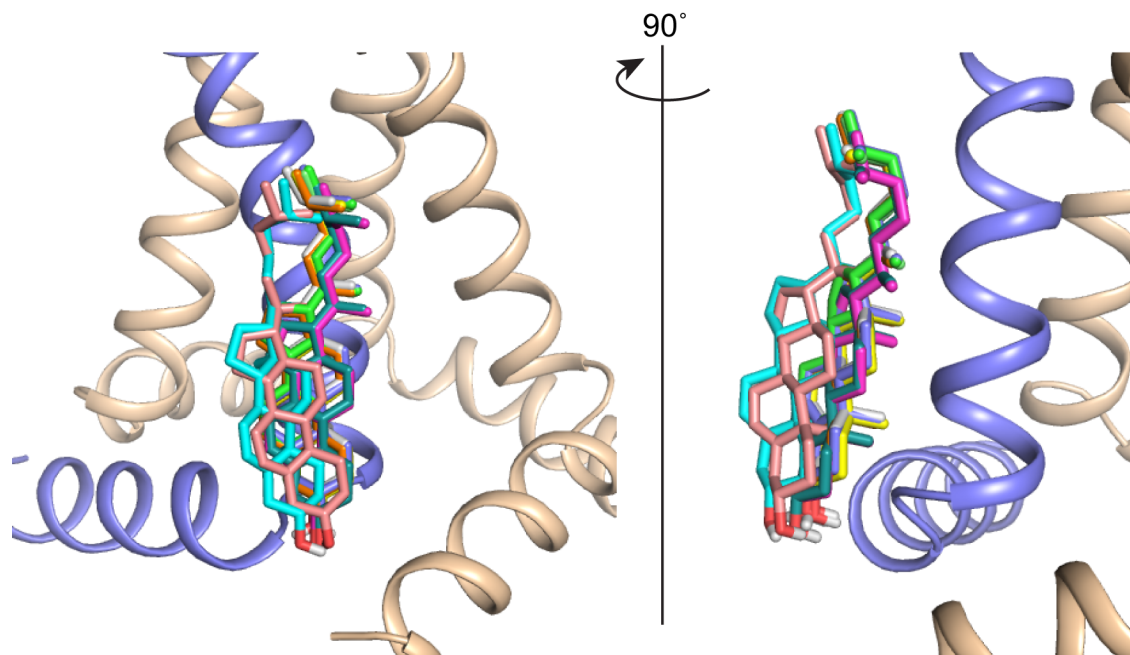

**Figure S9.** Top ten HADDOCK docked M2-CHOL structures. The ten structures were chosen by their agreement with the experimentally measured cholesterol orientation angles from the  $^2\text{H}$  NMR spectra.<sup>1</sup> The ensemble of structures show  $\beta$  angles of 20 – 26° and  $\gamma$  angles of 7 – 17°, in good agreement with the measured  $\beta$  angle of 11° and  $\gamma$  angle of 10°.

## References

- (1) Elkins, M. R.; Williams, J. K.; Gelenter, M. D.; Dai, P.; Kwon, B.; Sergeyev, I. V.; Pentelute, B. L.; Hong, M., *Proc. Natl. Acad. Sci. U. S. A.* **2017**, Cholesterol-binding site of the influenza M2 protein in lipid bilayers from solid-state NMR, *114*, 12946-12951.
- (2) Kalinowski, H.-O.; Berger, S.; Braun, S.  *$^{13}\text{C}$ -NMR-Spektroskopie*; Thieme-Verlag: Stuttgart, 1984.
- (3) Helmus, J. J.; Jaroniec, C. P., *J. Biomol. NMR* **2013**, Nmrglue: an open source Python package for the analysis of multidimensional NMR data, *55*, 355-367.
- (4) Liao, S. Y.; Lee, M.; Wang, T.; Sergeyev, I. V.; Hong, M., *J. Biomol. NMR* **2016**, Efficient DNP NMR of membrane proteins: sample preparation protocols, sensitivity, and radical location, *64*, 223-237.

**Appendix A.** HADDOCK parameter file. The PDB text for the M2 2L0J structure has been omitted for brevity. Renumbering of the residues in 2L0J is required for HADDOCK submission; in this case residue numbers for chain A were added to 100, chain B added to 200, chain C to 300, and chain D to 400. For example, L26 in chain A is renumbered to L126, while L26 in chain D is renumbered to L426.

```
HaddockRunParameters (  
  runname = 'm2cc10b',  
  auto_passive_radius = 6.5,  
  create_narestraints = True,  
  delenph = True,  
  ranair = False,  
  cmrest = False,  
  kcont = 1.0,  
  surfrest = True,  
  ksurf = 1.0,  
  noecv = True,  
  ncvpart = 2.0,  
  structures_0 = 1000,  
  ntrials = 5,  
  rotate180_0 = True,  
  smoothing = False,  
  structures_1 = 200,  
  rotate180_1 = False,  
  solvent = 'dmso',  
  waterrefine = 200,  
  epsilon = 10.0,  
  waterdock = False,  
  clust_meth = 'RMSD',  
  clust_rmsd = 2.5,  
  clust_size = 6,  
  fcc_ignc = False,  
  ncs = SymmetrySpecification (  
    on = False,  
    constant = 1.0,  
  ),  
  symmetry = SymmetrySpecification (  
    on = False,  
    constant = 10.0,  
  ),  
  unamb = ExtStageConstants (  
    firstit = 0,  
    lastit = 2,  
    stages = StageConstants (  
      hot = 10.0,  
      cool1 = 10.0,  
      cool2 = 50.0,  
      cool3 = 50.0,  
    ),  
  ),  
  amb = ExtStageConstants (  
    firstit = 0,  
    lastit = 2,  
    stages = StageConstants (  
      hot = 10.0,  
      cool1 = 10.0,  
      cool2 = 50.0,  
      cool3 = 50.0,
```

```

),
),
hbond = ExtStageConstants (
  firstit = 1,
  lastit = 2,
  stages = StageConstants (
    hot = 10.0,
    cool1 = 10.0,
    cool2 = 50.0,
    cool3 = 50.0,
  ),
),
dihedrals = StageConstants (
  hot = 5.0,
  cool1 = 5.0,
  cool2 = 50.0,
  cool3 = 200.0,
),
ssdihed = 'none',
rgrest = False,
rgtarg = 17.78,
krg = StageConstants (
  hot = 100.0,
  cool1 = 100.0,
  cool2 = 100.0,
  cool3 = 100.0,
),
rgsele = 'all',
air_scaling = False,
tot_unamb = 25,
tot_amb = 0,
mrswi = StageConstants (
  hot = 0.5,
  cool1 = 0.5,
  cool2 = 0.5,
  cool3 = 0.5,
),
rswi = StageConstants (
  hot = 0.5,
  cool1 = 0.5,
  cool2 = 0.5,
  cool3 = 0.5,
),
masy = StageConstants (
  hot = -1.0,
  cool1 = -1.0,
  cool2 = -0.1,
  cool3 = -0.1,
),
asy = StageConstants (
  hot = 1.0,
  cool1 = 1.0,
  cool2 = 0.1,
  cool3 = 0.1,
),
c1 = KarplusConstants (
  on = False,
  karplusa = 6.98,

```



```

karplusb = -1.38,
karplusc = 1.72,
karplUSD = -60.0,
stages = StageConstants (
  hot = 0.0,
  cool1 = 0.2,
  cool2 = 1.0,
  cool3 = 1.0,
),
),
c2 = KarplusConstants (
  on = False,
  karplUSA = 6.98,
  karplusb = -1.38,
  karplusc = 1.72,
  karplUSD = -120.0,
stages = StageConstants (
  hot = 0.0,
  cool1 = 0.2,
  cool2 = 1.0,
  cool3 = 1.0,
),
),
c3 = KarplusConstants (
  on = False,
  karplUSA = 6.98,
  karplusb = -1.38,
  karplusc = 1.72,
  karplUSD = -120.0,
stages = StageConstants (
  hot = 0.0,
  cool1 = 0.2,
  cool2 = 1.0,
  cool3 = 1.0,
),
),
c4 = KarplusConstants (
  on = False,
  karplUSA = 6.98,
  karplusb = -1.38,
  karplusc = 1.72,
  karplUSD = -120.0,
stages = StageConstants (
  hot = 0.0,
  cool1 = 0.2,
  cool2 = 1.0,
  cool3 = 1.0,
),
),
c5 = KarplusConstants (
  on = False,
  karplUSA = 6.98,
  karplusb = -1.38,
  karplusc = 1.72,
  karplUSD = -120.0,
stages = StageConstants (
  hot = 0.0,
  cool1 = 0.2,

```

```

    cool2 = 1.0,
    cool3 = 1.0,
),
),
par_nonbonded = 'OPLSX',
dihedflag = True,
elecflag_0 = True,
elecflag_1 = True,
dielec = 'cdie',
inter_rigid = 1.0,
scaling_init = ScalingConstants (
    rigid = 0.001,
    cool2 = 0.001,
    cool3 = 0.05,
),
scaling_fin = ScalingConstants (
    rigid = 0.001,
    cool2 = 1.0,
    cool3 = 1.0,
),
w_vdw = FloatArray (
    1.0,
    1.0,
    1.0,
),
w_elec = FloatArray (
    1.0,
    1.0,
    0.1,
),
w_dist = FloatArray (
    0.01,
    0.1,
    0.1,
),
w_rg = FloatArray (
    0.1,
    1.0,
    1.0,
),
w_sani = FloatArray (
    0.1,
    0.1,
    0.1,
),
w_xrdc = FloatArray (
    0.1,
    0.1,
    0.1,
),
w_xpcs = FloatArray (
    0.1,
    0.1,
    0.1,
),
w_dani = FloatArray (
    0.01,
    0.1,

```

```

    0.1,
),
w_vean = FloatArray (
    0.1,
    0.1,
    0.1,
),
w_cdih = FloatArray (
    0.0,
    0.0,
    0.0,
),
w_sym = FloatArray (
    0.1,
    0.1,
    0.1,
),
w_bsa = FloatArray (
    -0.01,
    -0.01,
    0.0,
),
w_deint = FloatArray (
    0.0,
    0.0,
    0.0,
),
w_desolv = FloatArray (
    1.0,
    1.0,
    1.0,
),
skip_struc = 0,
crossdock = True,
ensemble_multiply = False,
randorien = True,
rigidmini = True,
rigidtrans = True,
iniseed = 917,
tadhigh_t = 2000,
tadinit1_t = 2000,
tadfinal1_t = 500,
tadinit2_t = 500,
tadfinal2_t = 50,
tadinit3_t = 300,
tadfinal3_t = 50,
timestep = 0.002,
tadfactor = 8,
initiosteps = 0,
cool1_steps = 0,
cool2_steps = 1000,
cool3_steps = 1000,
firstwater = 'yes',
waterheatsteps = 100,
watersteps = 1250,
watercoolsteps = 500,
calcdesolv = False,
solvate_method = 'db',

```

```

db_method = 'kytedoolittle',
water_restraint_initial = 5.0,
water_restraint_cutoff = 5.0,
water_restraint_scale = 25.0,
water_tokeep = 0.25,
dnap_water_tokeep = 0.25,
water_randfrac = 0.0,
water_surfcutoff = 8.0,
water_analysis = False,
transwater = True,
waterensemble = 1,
anastruc_1 = 200,
dist_hb = 2.5,
dist_nb = 3.9,
keepwater = False,
p1 = HaddockPartnerParameters (
  r = RestraintsInterface (
    activereslist = "",
    passivereslist = "",
    auto_passive = False,
  ),
  segid = 'P',
  moleculetype = 'Protein',
  auto_his = True,
  his = HistidineStateArray (
  ),
  semiflex = SemiflexSegmentList (
    mode = 'automatic',
    segments = RangeArray (
    ),
  ),
  fullyflex = SegmentList (
    segments = RangeArray (
    ),
  ),
  charged_nter = False,
  charged_cter = False,
  pdb = PDBData (
    mode = 'submit',
    chain = 'All',
    pdldata =<Insert PDB file 2L0J here>
  ),
),
p2 = HaddockPartnerParameters (
  r = RestraintsInterface (
    activereslist = "",
    passivereslist = "",
    auto_passive = False,
  ),
  segid = 'L',
  moleculetype = 'Protein',
  auto_his = True,
  his = HistidineStateArray (
  ),
  semiflex = SemiflexSegmentList (
    mode = 'automatic',
    segments = RangeArray (

```

```

),
),
fullyflex = SegmentList (
  segments = RangeArray (
  ),
),
charged_onter = False,
charged_cter = False,
pdb = PDBData (
  mode = 'submit',
  chain = 'All',
  pdbname = 'HETATM 1 O03 CLR A 1 5.627 10.237 17.927 1.00 0.00 O \nHETATM 2 C01 CLR A
1 5.730 8.470 21.289 1.00 0.00 C \nHETATM 3 C02 CLR A 1 6.253 8.960 19.863 1.00 0.00
C \nHETATM 4 C03 CLR A 1 5.187 9.682 19.218 1.00 0.00 C \nHETATM 5 C04 CLR A 1
4.579 10.805 19.999 1.00 0.00 C \nHETATM 6 C05 CLR A 1 4.168 10.341 21.391 1.00 0.00 C
\nHETATM 7 C06 CLR A 1 2.969 10.769 21.968 1.00 0.00 C \nHETATM 8 C07 CLR A 1 2.590
10.578 23.292 1.00 0.00 C \nHETATM 9 C08 CLR A 1 3.668 10.034 24.209 1.00 0.00 C
\nHETATM 10 C09 CLR A 1 4.601 9.022 23.428 1.00 0.00 C \nHETATM 11 C10 CLR A 1 5.260
9.635 22.172 1.00 0.00 C \nHETATM 12 C11 CLR A 1 5.670 8.393 24.345 1.00 0.00 C
\nHETATM 13 C12 CLR A 1 5.079 7.824 25.669 1.00 0.00 C \nHETATM 14 C13 CLR A 1 4.354
8.848 26.450 1.00 0.00 C \nHETATM 15 C14 CLR A 1 3.240 9.311 25.465 1.00 0.00 C
\nHETATM 16 C15 CLR A 1 2.167 10.001 26.348 1.00 0.00 C \nHETATM 17 C16 CLR A 1 2.198
9.285 27.672 1.00 0.00 C \nHETATM 18 C17 CLR A 1 3.436 8.207 27.570 1.00 0.00 C
\nHETATM 19 C18 CLR A 1 5.160 9.927 26.959 1.00 0.00 C \nHETATM 20 C19 CLR A 1 6.378
10.685 22.545 1.00 0.00 C \nHETATM 21 C20 CLR A 1 4.008 7.914 28.962 1.00 0.00 C
\nHETATM 22 C21 CLR A 1 5.179 7.063 28.928 1.00 0.00 C \nHETATM 23 C22 CLR A 1 2.821
7.242 29.777 1.00 0.00 C \nHETATM 24 C23 CLR A 1 3.231 6.889 31.169 1.00 0.00 C
\nHETATM 25 C24 CLR A 1 2.005 6.379 32.120 1.00 0.00 C \nHETATM 26 C25 CLR A 1 1.494
5.108 31.780 1.00 0.00 C \nHETATM 27 C26 CLR A 1 2.678 4.227 32.425 1.00 0.00 C
\nHETATM 28 C27 CLR A 1 0.457 4.877 32.765 1.00 0.00 C \nHETATM 29 H01 CLR A 1 5.583
11.195 17.958 1.00 0.00 H \nEND\n',
),
),
tbldata = 'assign (segid P and resid 339 and name CG1)\n (segid L and resid 1 and name C17) 5.0 5.0 0\nassign
(segid P and resid 342 and name CG1)\n (segid L and resid 1 and name C17) 5.0 5.0 0\nassign (segid P and resid 335
and name CG1)\n (segid L and resid 1 and name C24) 5.0 5.0 0\nassign (segid P and resid 339 and name CG1)\n
(segid L and resid 1 and name C24) 5.0 5.0 0\nassign (segid P and resid 339 and name CA)\n (segid L and resid 1 and
name C13) 5.0 5.0 0\nassign (segid P and resid 342 and name CA)\n (segid L and resid 1 and name C13) 5.0 5.0
0\nassign (segid P and resid 339 and name CB)\n (segid L and resid 1 and name C21) 8.0 8.0 0\nassign (segid P and
resid 342 and name CB)\n (segid L and resid 1 and name C21) 8.0 8.0 0\nassign (segid P and resid 339 and name
CD1)\n (segid L and resid 1 and name C19) 8.0 8.0 0\nassign (segid P and resid 342 and name CD1)\n (segid L
and resid 1 and name C19) 8.0 8.0 0\nassign (segid P and resid 339 and name CA)\n (segid L and resid 1 and name
C18) 7.0 7.0 0\nassign (segid P and resid 342 and name CA)\n (segid L and resid 1 and name C18) 7.0 7.0 0\nassign
(segid P and resid 339 and name CB)\n (segid L and resid 1 and name C13) 8.0 8.0 0\nassign (segid P and resid 342
and name CB)\n (segid L and resid 1 and name C13) 8.0 8.0 0',
unambigtbldata = 'assign (segid P and resid 339 and name CG1)\n (segid L and resid 1 and name C13) 8.0 8.0
0\nassign (segid P and resid 339 and name CB)\n (segid L and resid 1 and name C15) 8.0 8.0 0\nassign (segid P and
resid 339 and name CB)\n (segid L and resid 1 and name C21) 8.0 8.0 0\nassign (segid P and resid 339 and name
CG2)\n (segid L and resid 1 and name C17) 8.0 8.0 0\nassign (segid P and resid 335 and name CA)\n (segid L and
resid 1 and name C25) 8.7 0.5 0.5\nassign (segid P and resid 336 and name CA)\n (segid L and resid 1 and name C25)
7.1 0.5 0.5\nassign (segid P and resid 339 and name CA)\n (segid L and resid 1 and name C25) 7.1 0.5 0.5\nassign
(segid P and resid 340 and name CA)\n (segid L and resid 1 and name C25) 9.2 0.5 0.5\nassign (segid P and resid 339
and name CG2)\n (segid L and resid 1 and name C26) 8.0 8.0 0\nassign (segid P and resid 339 and name CA)\n
(segid L and resid 1 and name C26) 8.0 8.0 0\nassign (segid P and resid 339 and name CA)\n (segid L and resid 1
and name C27) 8.0 8.0 0\nassign (segid P and resid 347 and (name CD1 or name CD2 or name CE1 or name CE2 or name
CG))\n\t\t(segid L and resid 1 and name C03) 7.0 7.0 0\nassign (segid P and resid 347 and (name CD1 or name CD2 or
name CE1 or name CE2 or name CG))\n\t\t(segid L and resid 1 and name C09) 8.0 8.0 0',
rdc1 = RDCParameters (

```

```

choice = 'VANGLE',
r = 0.4,
d = 8.0,
constants = ExtStageConstants (
  firstit = 0,
  lastit = 2,
  stages = StageConstants (
    hot = 0.1,
    cool1 = 1.0,
    cool2 = 1.0,
    cool3 = 1.0,
  ),
),
ini_bor = StageConstants (
  hot = 1.0,
  cool1 = 10.0,
  cool2 = 40.0,
  cool3 = 40.0,
),
fin_bor = StageConstants (
  hot = 10.0,
  cool1 = 40.0,
  cool2 = 40.0,
  cool3 = 40.0,
),
ini_cen = StageConstants (
  hot = 0.25,
  cool1 = 2.5,
  cool2 = 10.0,
  cool3 = 10.0,
),
fin_cen = StageConstants (
  hot = 2.5,
  cool1 = 10.0,
  cool2 = 10.0,
  cool3 = 10.0,
),
rdcdata = 'assign (segid P and resid 435 and name CA)\n (segid P and resid 441 and name CA)\n (segid L and resid 1
and name C13)\n (segid L and resid 1 and name C03) 0 0 11 5\nassign (segid P and resid 435 and name CA)\n (segid P
and resid 441 and name CA)\n (segid L and resid 1 and name C10)\n (segid L and resid 1 and name C19) 0 0 79.2 15',
),
rdc2 = RDCParameters (
  choice = 'NO',
  r = 0.4,
  d = 8.0,
  constants = ExtStageConstants (
    firstit = 0,
    lastit = 2,
    stages = StageConstants (
      hot = 0.1,
      cool1 = 1.0,
      cool2 = 1.0,
      cool3 = 1.0,
    ),
  ),
  ini_bor = StageConstants (
    hot = 1.0,
    cool1 = 10.0,

```

```

    cool2 = 40.0,
    cool3 = 40.0,
),
fin_bor = StageConstants (
    hot = 10.0,
    cool1 = 40.0,
    cool2 = 40.0,
    cool3 = 40.0,
),
ini_cen = StageConstants (
    hot = 0.25,
    cool1 = 2.5,
    cool2 = 10.0,
    cool3 = 10.0,
),
fin_cen = StageConstants (
    hot = 2.5,
    cool1 = 10.0,
    cool2 = 10.0,
    cool3 = 10.0,
),
),
rdc3 = RDCParameters (
    choice = 'NO',
    r = 0.4,
    d = 8.0,
    constants = ExtStageConstants (
        firstit = 0,
        lastit = 2,
        stages = StageConstants (
            hot = 0.1,
            cool1 = 1.0,
            cool2 = 1.0,
            cool3 = 1.0,
        ),
    ),
ini_bor = StageConstants (
    hot = 1.0,
    cool1 = 10.0,
    cool2 = 40.0,
    cool3 = 40.0,
),
fin_bor = StageConstants (
    hot = 10.0,
    cool1 = 40.0,
    cool2 = 40.0,
    cool3 = 40.0,
),
ini_cen = StageConstants (
    hot = 0.25,
    cool1 = 2.5,
    cool2 = 10.0,
    cool3 = 10.0,
),
fin_cen = StageConstants (
    hot = 2.5,
    cool1 = 10.0,
    cool2 = 10.0,

```

```

    cool3 = 10.0,
),
),
rdc4 = RDCParameters (
  choice = 'NO',
  r = 0.4,
  d = 8.0,
  constants = ExtStageConstants (
    firstit = 0,
    lastit = 2,
    stages = StageConstants (
      hot = 0.1,
      cool1 = 1.0,
      cool2 = 1.0,
      cool3 = 1.0,
    ),
  ),
),
ini_bor = StageConstants (
  hot = 1.0,
  cool1 = 10.0,
  cool2 = 40.0,
  cool3 = 40.0,
),
fin_bor = StageConstants (
  hot = 10.0,
  cool1 = 40.0,
  cool2 = 40.0,
  cool3 = 40.0,
),
ini_cen = StageConstants (
  hot = 0.25,
  cool1 = 2.5,
  cool2 = 10.0,
  cool3 = 10.0,
),
fin_cen = StageConstants (
  hot = 2.5,
  cool1 = 10.0,
  cool2 = 10.0,
  cool3 = 10.0,
),
),
rdc5 = RDCParameters (
  choice = 'NO',
  r = 0.4,
  d = 8.0,
  constants = ExtStageConstants (
    firstit = 0,
    lastit = 2,
    stages = StageConstants (
      hot = 0.1,
      cool1 = 1.0,
      cool2 = 1.0,
      cool3 = 1.0,
    ),
  ),
),
ini_bor = StageConstants (
  hot = 1.0,

```



```

    cool1 = 10.0,
    cool2 = 40.0,
    cool3 = 40.0,
),
fin_bor = StageConstants (
    hot = 10.0,
    cool1 = 40.0,
    cool2 = 40.0,
    cool3 = 40.0,
),
ini_cen = StageConstants (
    hot = 0.25,
    cool1 = 2.5,
    cool2 = 10.0,
    cool3 = 10.0,
),
fin_cen = StageConstants (
    hot = 2.5,
    cool1 = 10.0,
    cool2 = 10.0,
    cool3 = 10.0,
),
),
pcs1 = PCSParameters (
    choice = 'NO',
    constants = ExtStageConstants (
        firstit = 0,
        lastit = 2,
        stages = StageConstants (
            hot = 100.0,
            cool1 = 100.0,
            cool2 = 100.0,
            cool3 = 1000.0,
        ),
    ),
    r = 1000.0,
    d = 10000.0,
),
pcs2 = PCSParameters (
    choice = 'NO',
    constants = ExtStageConstants (
        firstit = 0,
        lastit = 2,
        stages = StageConstants (
            hot = 100.0,
            cool1 = 100.0,
            cool2 = 100.0,
            cool3 = 1000.0,
        ),
    ),
    r = 1000.0,
    d = 10000.0,
),
pcs3 = PCSParameters (
    choice = 'NO',
    constants = ExtStageConstants (
        firstit = 0,
        lastit = 2,

```

```

stages = StageConstants (
  hot = 100.0,
  cool1 = 100.0,
  cool2 = 100.0,
  cool3 = 1000.0,
),
),
r = 1000.0,
d = 10000.0,
),
pcs4 = PCSPParameters (
  choice = 'NO',
  constants = ExtStageConstants (
    firstit = 0,
    lastit = 2,
    stages = StageConstants (
      hot = 100.0,
      cool1 = 100.0,
      cool2 = 100.0,
      cool3 = 1000.0,
    ),
  ),
  r = 1000.0,
  d = 10000.0,
),
pcs5 = PCSPParameters (
  choice = 'NO',
  constants = ExtStageConstants (
    firstit = 0,
    lastit = 2,
    stages = StageConstants (
      hot = 100.0,
      cool1 = 100.0,
      cool2 = 100.0,
      cool3 = 1000.0,
    ),
  ),
  r = 1000.0,
  d = 10000.0,
),
pcs6 = PCSPParameters (
  choice = 'NO',
  constants = ExtStageConstants (
    firstit = 0,
    lastit = 2,
    stages = StageConstants (
      hot = 100.0,
      cool1 = 100.0,
      cool2 = 100.0,
      cool3 = 1000.0,
    ),
  ),
  r = 1000.0,
  d = 10000.0,
),
pcs7 = PCSPParameters (
  choice = 'NO',
  constants = ExtStageConstants (

```

```

    firstit = 0,
    lastit = 2,
    stages = StageConstants (
      hot = 100.0,
      cool1 = 100.0,
      cool2 = 100.0,
      cool3 = 1000.0,
    ),
  ),
  r = 1000.0,
  d = 10000.0,
),
pcs8 = PCSPParameters (
  choice = 'NO',
  constants = ExtStageConstants (
    firstit = 0,
    lastit = 2,
    stages = StageConstants (
      hot = 100.0,
      cool1 = 100.0,
      cool2 = 100.0,
      cool3 = 1000.0,
    ),
  ),
  r = 1000.0,
  d = 10000.0,
),
pcs9 = PCSPParameters (
  choice = 'NO',
  constants = ExtStageConstants (
    firstit = 0,
    lastit = 2,
    stages = StageConstants (
      hot = 100.0,
      cool1 = 100.0,
      cool2 = 100.0,
      cool3 = 1000.0,
    ),
  ),
  r = 1000.0,
  d = 10000.0,
),
pcs10 = PCSPParameters (
  choice = 'NO',
  constants = ExtStageConstants (
    firstit = 0,
    lastit = 2,
    stages = StageConstants (
      hot = 100.0,
      cool1 = 100.0,
      cool2 = 100.0,
      cool3 = 1000.0,
    ),
  ),
  r = 1000.0,
  d = 10000.0,
),
dan1 = DANIPParameters (

```

```

choice = 'NO',
constants = ExtStageConstants (
  firstit = 0,
  lastit = 2,
  stages = StageConstants (
    hot = 1.0,
    cool1 = 5.0,
    cool2 = 10.0,
    cool3 = 10.0,
  ),
),
tc = 9.771,
anis = 1.557,
r = 0.455,
wh = 599.91,
wn = 60.82,
),
dan2 = DANIPParameters (
  choice = 'NO',
  constants = ExtStageConstants (
    firstit = 0,
    lastit = 1,
    stages = StageConstants (
      hot = 1.0,
      cool1 = 5.0,
      cool2 = 10.0,
      cool3 = 10.0,
    ),
  ),
  tc = 9.84,
  anis = -1.35,
  r = 0.308,
  wh = 599.91,
  wn = 60.82,
),
dan3 = DANIPParameters (
  choice = 'NO',
  constants = ExtStageConstants (
    firstit = 1,
    lastit = 1,
    stages = StageConstants (
      hot = 1.0,
      cool1 = 5.0,
      cool2 = 10.0,
      cool3 = 10.0,
    ),
  ),
  tc = 9.84,
  anis = -1.35,
  r = 0.308,
  wh = 599.91,
  wn = 60.82,
),
dan4 = DANIPParameters (
  choice = 'NO',
  constants = ExtStageConstants (
    firstit = 0,
    lastit = 2,

```

```

stages = StageConstants (
  hot = 1.0,
  cool1 = 5.0,
  cool2 = 10.0,
  cool3 = 10.0,
),
),
tc = 9.84,
anis = -1.35,
r = 0.308,
wh = 599.91,
wn = 60.82,
),
dan5 = DANIParameters (
  choice = 'NO',
  constants = ExtStageConstants (
    firstit = 0,
    lastit = 2,
    stages = StageConstants (
      hot = 1.0,
      cool1 = 5.0,
      cool2 = 10.0,
      cool3 = 10.0,
    ),
  ),
  tc = 9.84,
  anis = -1.35,
  r = 0.308,
  wh = 599.91,
  wn = 60.82,
),
username = 'melk@mit.edu',
)

```
